# Supplementary material for: Simple discovery of bacterial biocatalysts from environmental samples through functional metaproteomics
Source: PubMed Central journal article supplement (PMC5335836; doi:10.1186/s40168-017-0247-9), 2017-03-03
Supplement: 40168_2017_247_MOESM1_ESM.pdf [file 40168_2017_247_MOESM1_ESM.pdf]

1 **Supplementary Information**

2 **Materials and Methods**

3 *Environmental sample preparation*

4 Soil samples were collected from a used cooking oil deposit site of a restaurant (Dortmund,  
5 Germany, Latitude/Longitude: 51.528874,7.458762) with the assumption that long-term  
6 exposure to oil contamination led to a natural selection for microbes capable of metabolizing oil.  
7 Each soil sample was homogenized by grinding and sieving (2 mm particle size). Lipase-  
8 producing bacteria were enriched by inoculating 1 L of modified Belitzky Minimal Medium [27]  
9 with 1 g of soil. The medium was supplemented with olive oil (2 %) as the sole carbon source.  
10 Upon growth (3 days), the cultures were centrifuged to acquire the pellet and stored at -80 °C.

11 *Protein Extraction and 2D Gel Electrophoresis*

12 The cell pellets of oil-metabolizing organisms were disrupted to acquire the proteome for 2D  
13 polyacrylamide gel electrophoresis analysis by a bead-beating method in the presence of a non-  
14 ionic detergent, n-Dodecyl  $\beta$ -D-maltoside. Approximately 3-5 ml cell pellet was resuspended in  
15 350  $\mu$ l Sample Buffer [28] (50 mM Bis-Tris, 50 mM NaCl, 1 mM EDTA, pH 7) and 100  $\mu$ l of  
16 10 % (w/v) n-dodecyl  $\beta$ -D-maltoside. Glass beads (diameter 0.5 mm) in a volume approximating  
17 the size of the cell pellet were added. The suspension was vortexed 5 min and incubated for  
18 20 min on ice. Subsequently, it was centrifuged at 16,000 x g at 4° C. Proteins were precipitated  
19 from the supernatant using a methanol/chloroform extraction. For this purpose, 3 volumes of  
20 water, 4 volumes of methanol and 1 volume of chloroform were added to 1 volume of protein-  
21 containing supernatant. The mixture was vortexed vigorously and centrifuged for 20 min at  
22 16,000 x g and 4° C. The protein precipitate was found at the interface between the two phases.  
23 The top phase was removed carefully without disturbing the precipitate. Then 400  $\mu$ l of methanol

24 was added and the sample vortexed vigourously before centrifuging the sample in the above-  
25 mentioned conditions. The protein precipitate, now at the bottom of the tube, was washed three  
26 times with chilled acetone, before briefly drying the pellet and re-suspending it in DTT-free  
27 rehydration buffer (7 M urea, 2 M thiourea, 65 mM CHAPS, 0.5 % v/v Triton X-100, 1.04 % v/v  
28 Pharmalyte pH 3-10 and traces of bromophenol Blue). The protein solution was then separated in  
29 a 2 D gel electrophoresis using a protocol previously published [29] with the following  
30 modifications: the equilibrating solution used to prepare the isoelectric focussing IPG gel strip  
31 neither contained DTT nor iodoacetamide. 2D gels not intended for zymography were stained  
32 with RuBPS Protein Gel Stain and proteins were visualized on a Typhoon laser scanner (GE  
33 Healthcare, Freiburg, Germany). 2D gels were performed in duplicates.

#### 34 *Zymography to detect lipolytic enzymes*

35 After protein separation, the zymography 2 D gels were incubated for  $3 \times 10$  min in 400 ml  
36 Triton X-100 (2.5 % v/v) to remove interfering SDS from the gels. The gel was then incubated in  
37 400 ml phosphate buffer (50 mM, pH 7) followed by incubation of the gel in 400 ml 100  $\mu$ M  
38 *p*-methylumbelliferyl butyrate (pMUB) solution in phosphate buffer. pMUB is a fluorogenic  
39 substrate for lipolytic enzymes. A lipase or an esterase hydrolyses the substrate to butyric acid  
40 and the fluorescent *p*-methylumbelliferone, which can be detected under UV light. Fluorescing  
41 spots were manually excised for subsequent mass spectrometry on a UV table.

#### 42 *Mass Spectrometry*

43 The excised protein spots were treated twice for 15 min with 400  $\mu$ l 20 mM ammonium  
44 bicarbonate in 30 % acetonitrile. Subsequently protein spots were reduced in 50  $\mu$ l 10 mM DTT  
45 at 60 °C for 45 min and then alkylated with 50 mM iodoacetamide at 25 °C in the dark. The gel  
46 spots were then washed twice for 5 min with 400  $\mu$ l 20 mM ammonium bicarbonate in 30 %

47 acetonitrile and dried completely in a vacuum centrifuge. The spots were tryptically digested  
48 overnight at 37 °C using 6.25 ng/μl trypsin in 20 mM ammonium bicarbonate, 30 % acetonitrile.  
49 Trypsin was obtained from Promega, Fitchburg, USA. Peptides were eluted into ultrapure water  
50 containing 0.1 % trifluoroacetic acid using an ultrasonic bath for 15 min. Eluates were loaded on  
51 a trap column (C<sub>18</sub>, pore size 100 Å, particle diameter 5 μm, inner diameter 180 μm, length  
52 20 mm, Waters, Eschborn, Germany) and were then eluted using a gradient of acetonitrile with  
53 0.1 % formic acid (flow rate 350 nl/min, linear gradient 0.5-5 % in 4 min, 5-60 % in 45 min)  
54 from an analytical column at 40 °C (C<sub>18</sub>, pore size 130 Å, particle diameter 1.7 μm, inner  
55 diameter 75 μm, length 150 mm) followed by mass spectrometry using a Synapt G2-S  
56 instrument (Waters). Spectra were recorded in positive resolution mode over a mass range of  
57 50-1800 m/z with 1 s/scan using the MS<sup>E</sup> technology with a collision ramp of 14-35 eV. The  
58 parameters used for the NanoLockSpray source were as follows: Capillary voltage of 2.2 kV;  
59 Sampling cone voltage of 30 V; source temperature of 100 °C; desolvation temperature of  
60 150 °C; cone gas flow of 50 L/h and desolvation gas flow of 500 L/h. Leucine enkephaline,  
61 serving as lock mass analyte (m/z=556.2771), was fed through the lock spray channel.  
62 Data were analyzed using the ProteinLynxGlobalServer 2.5.2 (PLGS; Waters) software. Mass  
63 spectra were processed using the parameters as follows: chromatographic peak width set to  
64 automatic; MS ToF resolution set to automatic; lock mass window of 0.25 Da; low energy  
65 threshold of 50 counts; elevated energy threshold of 15 counts; elution time of 5-45 min;  
66 intensity threshold of 500 counts.  
67 A metagenomics-derived database was used for protein identification using the parameters as  
68 follows: peptide tolerance set to automatic; fragment tolerance set to automatic; minimal  
69 fragment ion matches per peptide of 2; minimal fragment ion matches per protein of 2; minimal

70 peptide matches per protein of 1; maximum protein mass of 250 kDa; primary digest reagent was  
71 trypsin; missed cleavages was set to 2; carbamidomethyl C was set as fixed modifications;  
72 deamidation N and Q, oxidation M were set as variable modifications and false positive rate was  
73 set at 4 %.

74 The mass spectrometry proteomics data along with the metagenomics-derived database, have  
75 been deposited to the ProteomeXchange Consortium via the PRIDE partner repository with the  
76 dataset identifier PXD005148. Username for review purposes: reviewer00553@ebi.ac.uk  
77 Password: WJRenYTK. The deposited data includes the unprocessed MS data, as well as the  
78 ProteinLynxGlobalServer output after processing. The output data includes tables in .csv  
79 (comma separated values) format for all identified fragment-ions, peptides and proteins,  
80 respectively. Furthermore, reports for the data base search (IA\_log and IA\_workflow) are given.

#### 81 *DNA extraction, sequencing, and annotation*

82 High quality, unsheared DNA was extracted by combining a bead-beating method with a  
83 commercial kit-based extraction. The enriched cell-pellet was initially disrupted using glass beads  
84 and 450  $\mu$ l STES buffer (0.1 % SDS, 0.2 M Tris-HCl pH 7.5, 0.01 M EDTA and 0.5 M NaCl).  
85 Upon centrifugation (16,000 x g, 10 min, RT), the cell lysate was transferred into QIAamp® DNA  
86 Mini and Blood Mini Kit Filter (QIAGEN GmbH, Hilder, Germany). The DNA was then isolated  
87 according to the standard manufacturer's protocol. The acquired DNA (OD<sub>260/280</sub>=1.9 and an  
88 OD<sub>260/230</sub>=2.0) was sequenced at GATC (Constance, Germany) in 300 bp paired end reads using  
89 the MiSeq platform.

90 Reads were trimmed with the program trim\_fastq1.pl with a minimum read length after trimming  
91 of 150 nt and the minimum quality for cutoff set to a phred score of 20. The sequence data was  
92 assembled using SPAdes (v3.1.1) with k-values of 21, 33, 55, 77, 99, and 127 and annotated and

93 translated into an amino-acid sequence library using Prokka (v1.10). SPAdes was invoked using  
94 `./spades.py -k 21,33,55,77,99,127 --careful --only-assembler --pe1-12 paired_end_library.fastq --`  
95 `s1 single_read_library.fastq -o NG7675_spades1`. Prokka was invoked using `./prokka --outdir`  
96 `output_directory --prefix NG7675_spades1_prokka --metagenome`  
97 `NG7675_spades1_scaffolds.fasta`.

98 The resulting database was used for identifying lipases from the 2D zymograms.

99 Sequencing data of the sample was submitted to the European Nucleotide Archive

100 ([www.ebi.ac.uk/ena](http://www.ebi.ac.uk/ena)) under project number PRJEB16064 and sample accession numbers

101 ERP017906.

102 *Heterologous expression of metaproteomic lipase ML-005 and enzyme activity assays*

103 The protein sequence for lipase ML-005 was re-translated to a codon-optimized gene sequence

104 for expression in *E. coli* and synthesized (GeneArt, Regensburg, Germany). The gene was then

105 cloned into a pTAC-MAT-Tag-2 (Sigma Aldrich, St. Louis, MO, USA) based expression vector<sup>4</sup>

106 and in the pET22b expression vector with a T7 promoter system and a C-terminal His<sub>6</sub>-tag for

107 purification. The vectors were transformed into *Escherichia coli* XL1 Blue (pTAC-MAT-Tag-2)

108 and BL21 (pET22b) using heat shock transformation. For crude cell extract generation, the XL1

109 Blue cells containing ML-005, *Bacillus subtilis* LipA, or an empty vector were grown overnight

110 at 37 °C in LB liquid medium with 100 µg/ml ampicillin for selection. Next day, a secondary

111 culture (10 ml LB supplemented with ampicillin) was inoculated with the overnight culture to an

112 OD<sub>600</sub> of 0.05. IPTG (1 mM) was added at OD<sub>600</sub> of approximately 0.5 and the culture incubated

113 for another 2-3 h. The cultures were centrifuged (13,000 x g, 2 min, 4° C) and the acquired cell

114 pellet was resuspended in Tris-HCl buffer (pH 7). The cell suspension was disrupted through

115 sonication (amplitude: 80 %, Cycle: 0.5 s, 3 x 1 min) using a Vial Tweeter instrument (Hielscher,

116 Teltow, Germany). The resulting crude extract was centrifuged (13,000 x g, 20 min, 4 °C) to  
117 remove cell debris. The supernatant was used for spectrophotometric lipolytic activity  
118 determination using pNP-butyrate. The diluted supernatant (2 % v/v in 50 mM Tris-HCl pH 7)  
119 was kept at 45 °C. The hydrolysis reaction was initialised by adding 200 µM pNP-ester from a  
120 4 mM stock in aqueous solution with 4% ethanol, 1% acetonitrile, and 0.4% Triton X-100. The  
121 enzymatic reaction was measured by monitoring the absorbance at 420 nm in a V-650  
122 spectrophotometer (Jasco, Tokyo, Japan). These experiments were performed with three  
123 biological replicates (Figure S4). For purification of ML-005, *E. coli* BL-21 was inoculated in  
124 LB medium, supplemented with 100 mg/l ampicillin from an overnight culture at an OD600 of  
125 0.05. At an OD600 of 0.5, overexpression was induced by 1 mM of IPTG and the cell suspension  
126 incubated overnight at 20°C under constant shaking. Cells were harvested by centrifugation (45  
127 min at 6,500x g and 4°C.) The resulting pellet was resuspended in approximately 50 ml of Tris-  
128 HCl-buffer (50mM, pH 7.1). Cell disruption was carried using the Constant Cell Disruption  
129 System (Constant Systems, Low March, UK) at 1.9 kbar three times. The cell lysate was  
130 centrifuged for 60 min at 6,500 g and 4°C to get rid of cell debris. The supernatant containing the  
131 soluble protein was filtered using 250 ml Filtropur V50 vacuum filters (Sarstedt, Nümbrecht,  
132 Germany). An ÄKTApurifier FPLC system (GE Healthcare, Uppsala, Sweden) was used to  
133 purify ML-005. A 5 ml HisTrap HP Ni-NTA-column (GE Healthcare, Uppsala, Sweden) was  
134 first washed with distilled water and then equilibrated using Buffer A (50 mM sodium  
135 phosphate, 300 mM NaCl, pH 8.0). The filtrate was loaded into the column and ML-005 was  
136 eluted using 10% and 12% of Buffer B (50 mM sodium phosphate, 300 mM NaCl, 500 mM  
137 imidazole, pH 8.0). The resulting protein solution was dialyzed overnight at 4°C against 50 mM  
138 sodium phosphate buffer (pH 8) using a Spektra/Por Dialysis Membrane 12–14 kDa

139 (Spectrumlabs, Rancho Dominguez, USA). Substrate specificity against *para*-nitrophenyl (pNP)  
140 esters was performed as described above, the hydrolysis reaction was initialised by adding  
141 50  $\mu\text{M}$  of the corresponding pNP ester to a 38.3 nM protein solution in 50 mM sodium phosphate  
142 buffer (pH 8). The enzymatic reaction was measured over approximately 8 min by monitoring  
143 the absorbance at 405 nm in a V-650 spectrophotometer (Jasco, Tokyo, Japan). The activity was  
144 calculated from the initial slope of the absorbance. The activity against pNP-butyrate  
145 ( $14.1 \text{ U} \cdot \text{mg}^{-1}$ ) was set to 100%.  
146





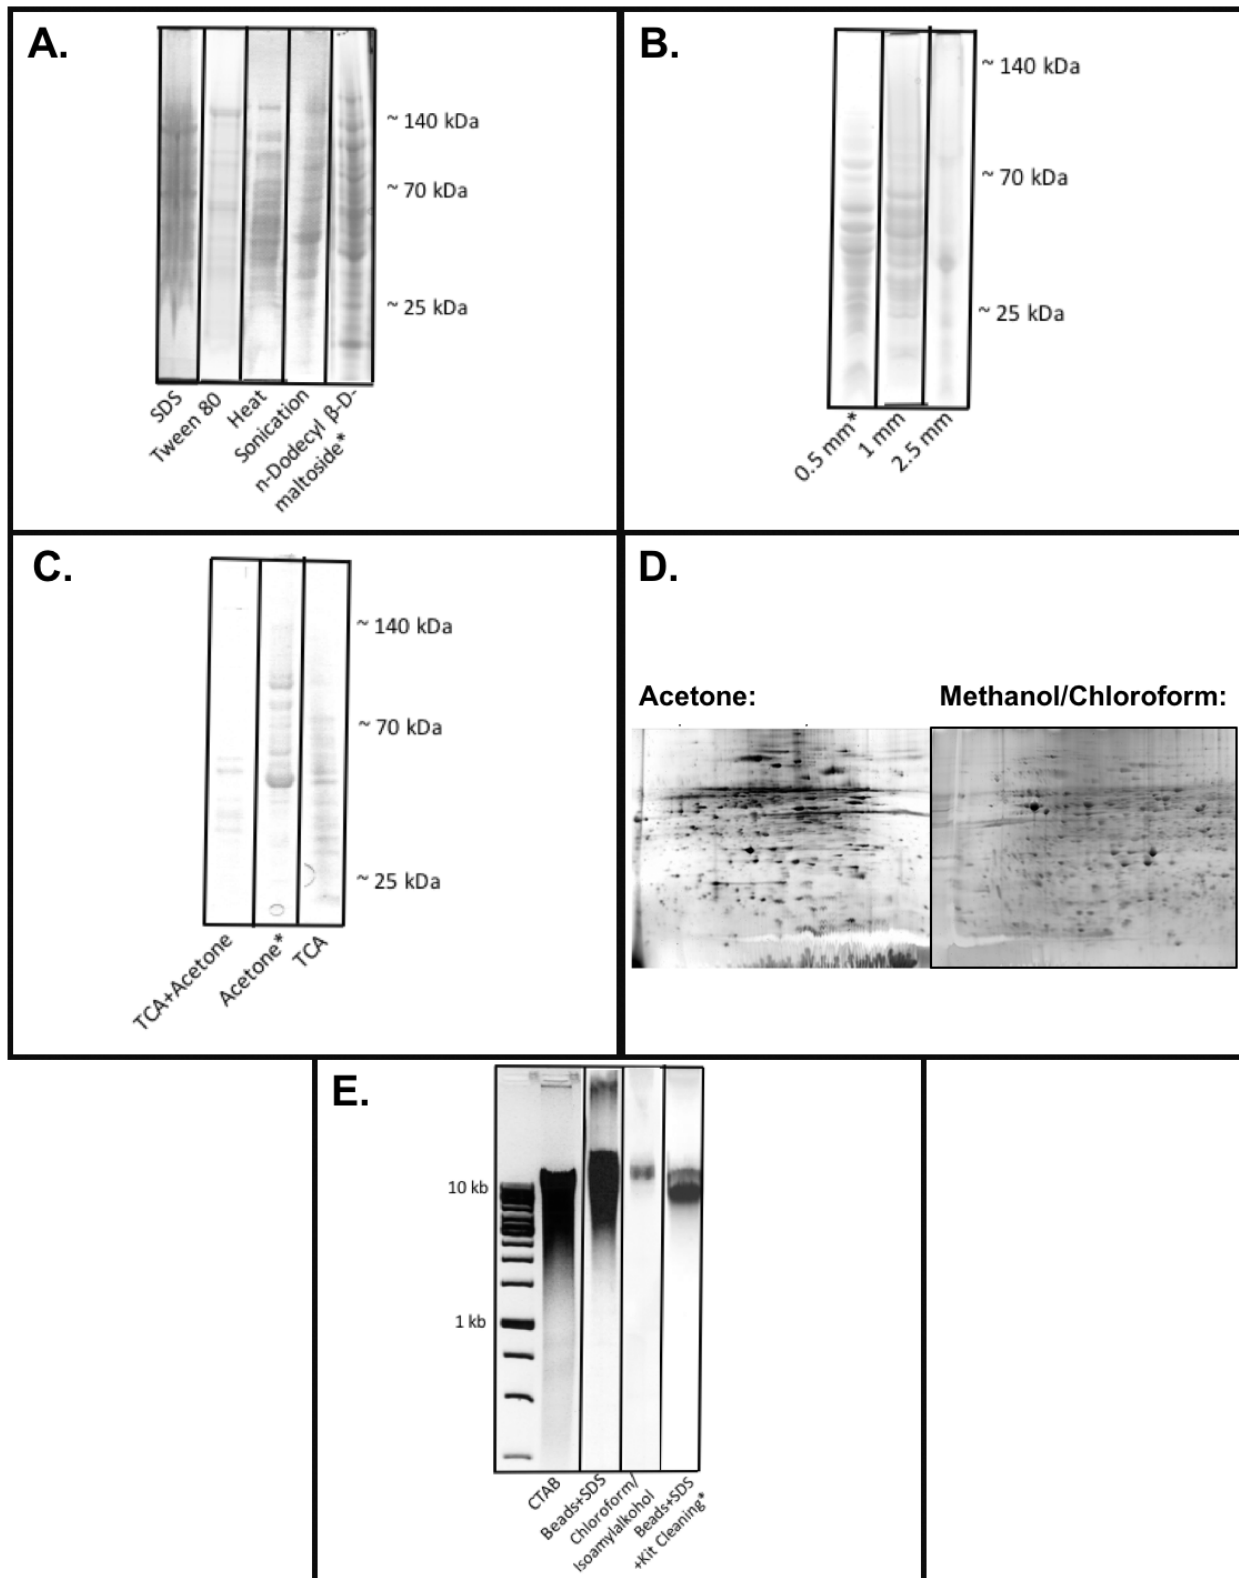

157

158

159 **Figure S2:** Optimization of protein and DNA extraction protocols. \*denotes that the parameter  
160 was deemed as the best for our specific sample and was then implemented in the next  
161 optimization step. **(A)** Cell disruption was carried out by physical methods: Sonication (3 x 30 s;  
162 amplitude 80; cycle 0.5) and heat (95°C; 5 min); as well as with detergents: SDS (5% v/v, 15  
163 min), tween 80 (1.5% v/v, 40 min incubation) and dodecyl maltoside (see Materials and  
164 Methods). Dodecyl maltoside yielded the highest amount of proteins. **(B)** To enhance cell lyses,  
165 bead beating was employed. Different diameters of beads were tested to evaluate their efficacy in  
166 supporting cell lysis. 0.5 mm glass beads yielded the most protein bands and reduced smearing.  
167 **(C)** Protein precipitation methods to remove impurities that lead to band smearing on an SDS  
168 PAGE gel were tested. Acetone was initially chosen as the protein precipitation method of  
169 choice as it resulted in higher protein recovery than a trichloroacetic acid (TCA) and an acetone  
170 + TCA hybrid method. **(D)** However, acetone precipitation resulted in horizontal smearing in 2D  
171 PAGE gels. Methanol-chloroform precipitation was finally chosen as alternative to acetone  
172 precipitation as it led to higher purity and recovery and better focusing of protein spots. **(E)** To  
173 extract unsheared DNA from the environmental sample, we evaluated several DNA extraction  
174 methods. In the CTAB method cetrimonium bromide, a surfactant, was used for cell disruption,  
175 followed by isopropanol precipitation of DNA. In the chloroform/isoamylalcohol method, DNA  
176 was extracted using lysozyme (2mg), SDS (10% v/v) and chloroform/isoamylalkohol (24:1).  
177 DNA was then precipitated using ethanol. DNA was also extracted using a bead-beating method.  
178 0.5 mm glass beads were used in the presence of 0.1% SDS and subsequent phenol/chloroform  
179 extraction. DNA was then precipitated using ethanol. Only the DNA acquired through bead  
180 beating method was unsheared. To increase the quality, DNA was further purified by using the

181 QIAamp® DNA Mini and Blood Mini Kit. This additional step provided unsheared, pure DNA  
182 (OD<sub>260/280</sub> = 1.9 and an OD<sub>260/230</sub> = 2.0) with sufficient quality for sequencing.

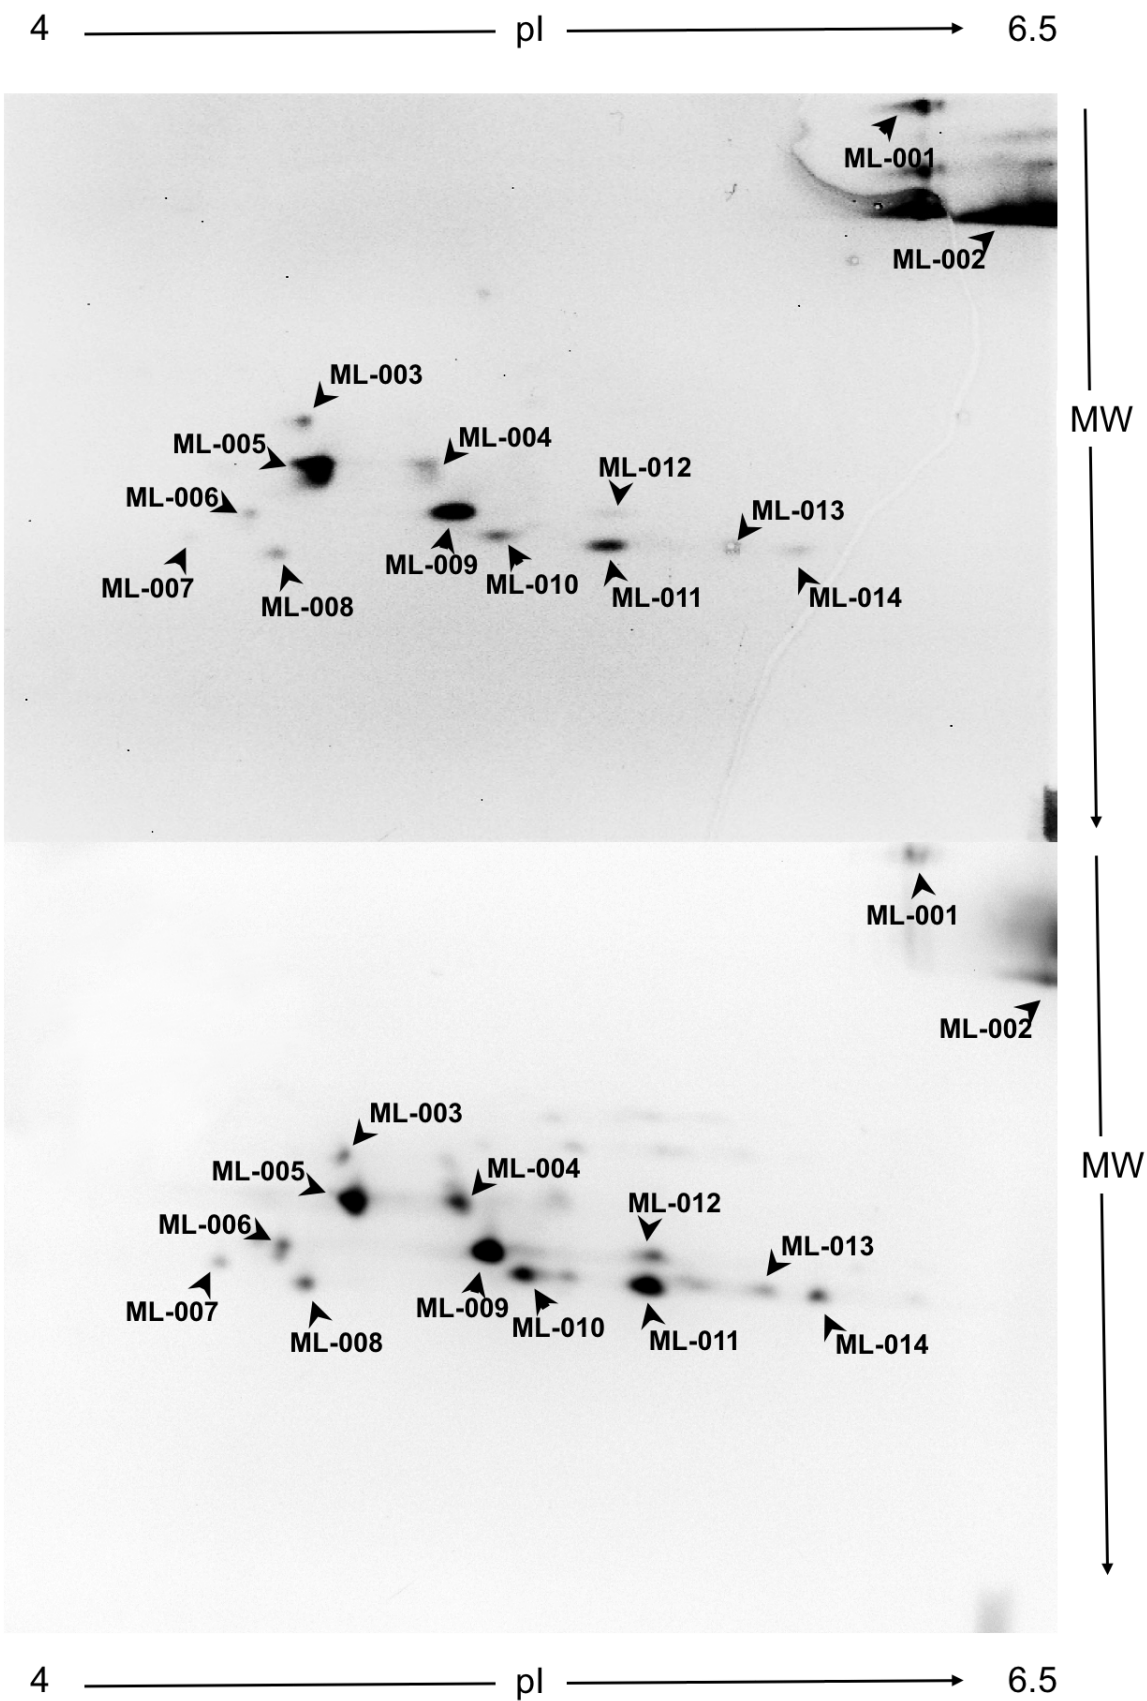

184 **Figure S3:** Technical replicates of zymograms from 2D gels from the protein extract of our  
185 environmental sample. Protein extract was separated and in-gel activity assay was performed in  
186 independent experiments on different days.

187

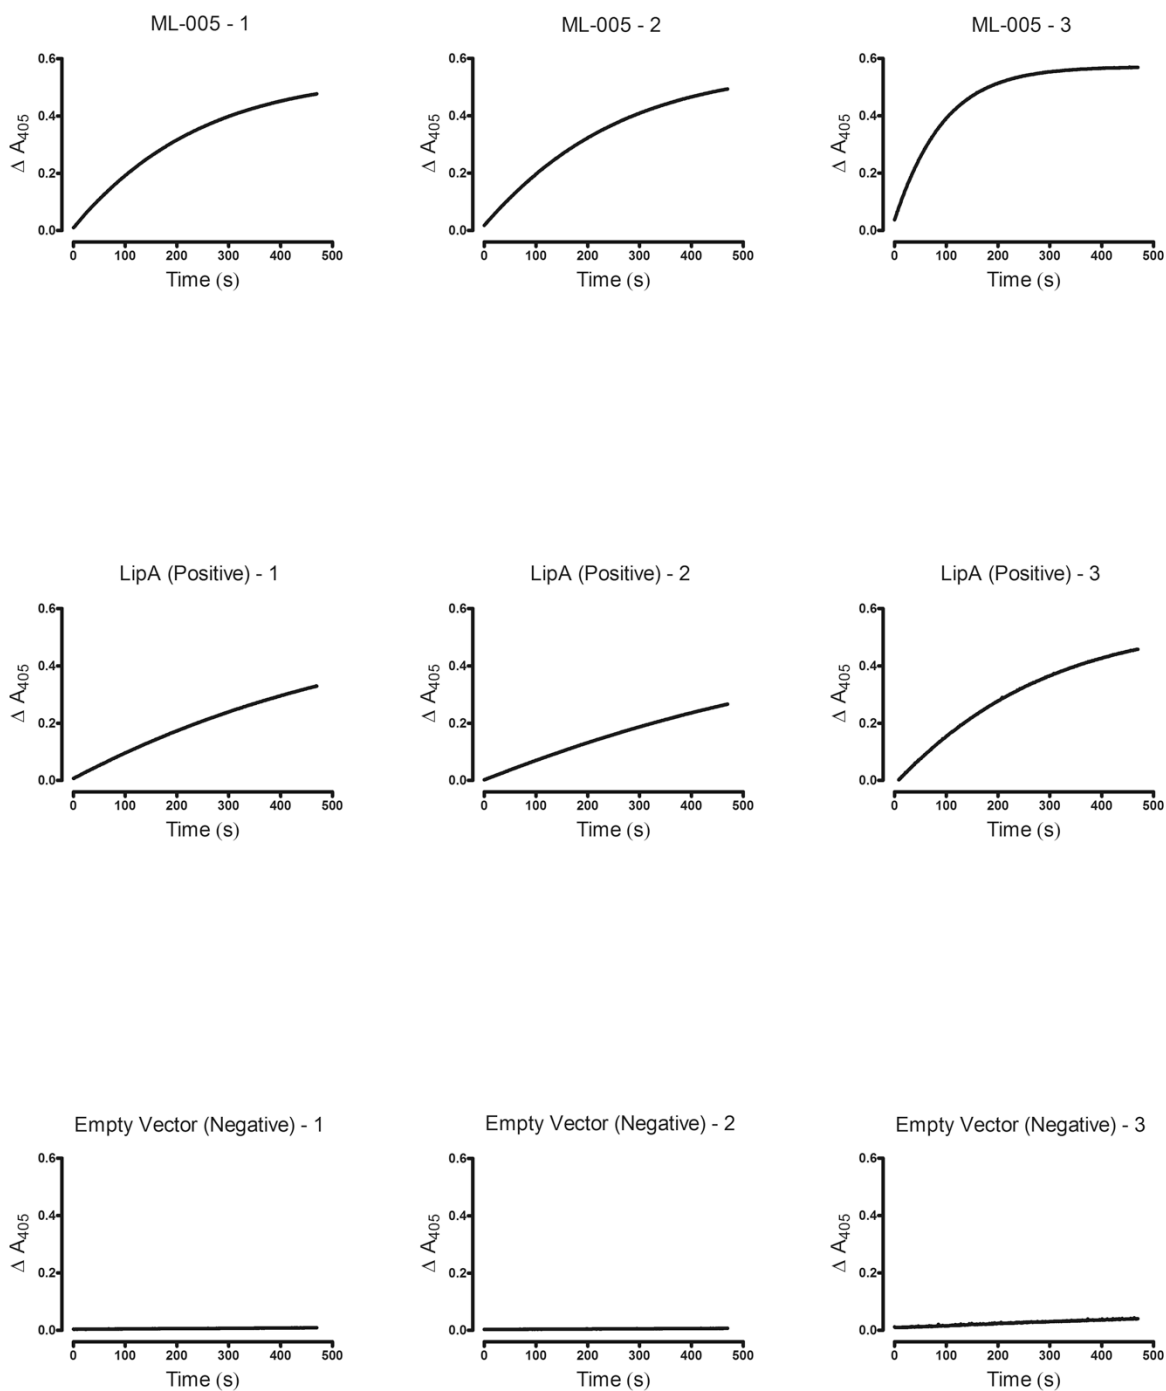

188

189 **Figure S4:** Biological replicates of the *para*-nitrophenyl butyrate hydrolysis assays with crude  
 190 extract from *E. coli* expressing the novel esterase ML-005, Lipase A (LipA) from *B. subtilis* as  
 191 positive control, or containing empty vector as negative control.

192 **Table S1:**

193 List of identified proteins from 2D gels according to PLGS software. Multiple proteins were identified most likely  
 194 due to the presence of multiple proteins at the site of activity-based excision of protein spots. Identified proteins that  
 195 were considered potential lipolytic enzymes are highlighted in bold. Molecular weight (Da) and pI are predicted.  
 196 Peptides: number of peptides identified. ML-001 to ML-014 represent the 14 lipolytic spots excised from  
 197 zymography gels. LS-001 is a landmark spot excised from RuBPS stained gels. Spots were tryptically digested and  
 198 analyzed via mass spectrometry. The full dataset including peptide sequences and raw data is available via  
 199 ProteomeXchange with identifier PXD005148 [26].

200

| ID     | Database ID         | Description                                      | mW (Da) | pI (pH) | Peptides |
|--------|---------------------|--------------------------------------------------|---------|---------|----------|
| LS-001 | PROKKA_92879        | Major outer membrane protein<br>P.IB precursor   | 39796   | 4.8     | 99       |
| ML-001 | PROKKA_100300       | Chaperone protein DnaK                           | 68374   | 4.7     | 24       |
|        | PROKKA_92465        | Chaperone protein DnaK                           | 68358   | 4.7     | 25       |
|        | PROKKA_22662        | Chaperone protein DnaK                           | 37702   | 4.6     | 14       |
|        | PROKKA_138643       | Chaperone protein DnaK                           | 69042   | 4.6     | 20       |
|        | PROKKA_72460        | Chaperone protein DnaK                           | 24543   | 4.6     | 11       |
|        | PROKKA_138668       | Chaperone protein DnaK                           | 24943   | 4.6     | 13       |
|        | PROKKA_150754       | Chaperone protein DnaK                           | 59912   | 4.6     | 20       |
|        | PROKKA_143530       | Chaperone protein DnaK                           | 68343   | 4.6     | 22       |
|        | PROKKA_139251       | Chaperone protein DnaK                           | 68632   | 4.7     | 20       |
| ML-002 | PROKKA_41331        | A-type flagellin                                 | 57137   | 4.5     | 17       |
|        | PROKKA_70441        | Hypothetical protein                             | 13678   | 6.6     | 4        |
|        | <b>PROKKA_02512</b> | <b>Putative acyl-CoA thioester<br/>hydrolase</b> | 15058   | 7.3     | 1        |
|        | PROKKA_90774        | Methionine synthase                              | 23142   | 4.8     | 4        |

201

202

203 **Table S1 continued:**

| ID           | Database ID                                          | Description                                                              | mW (Da) | pI (pH) | Peptides |
|--------------|------------------------------------------------------|--------------------------------------------------------------------------|---------|---------|----------|
| ML-003       | PROKKA_67835                                         | Superoxide dismutase [Fe]                                                | 22892   | 5.5     | 13       |
|              | PROKKA_00382                                         | Isocitrate dehydrogenase<br>[NADP]                                       | 45583   | 5.2     | 9        |
|              | PROKKA_127235                                        | Isocitrate dehydrogenase<br>[NADP]                                       | 45572   | 5.1     | 9        |
|              | <b>PROKKA_80567</b>                                  | <b>Thioesterase superfamily<br/>protein</b>                              | 12138   | 5.2     | 4        |
|              | PROKKA_38202                                         | Isocitrate dehydrogenase<br>[NADP]                                       | 45493   | 5.3     | 11       |
|              | PROKKA_161078                                        | Isocitrate dehydrogenase<br>[NADP]                                       | 45686   | 5.5     | 7        |
|              | PROKKA_35975                                         | Nucleoside diphosphate kinase                                            | 15438   | 5.4     | 8        |
|              | PROKKA_21910                                         | Ribosome-recycling factor                                                | 20640   | 5.5     | 8        |
|              | PROKKA_18267                                         | 50S ribosomal protein<br>L28^APROKKA_135858 50S<br>ribosomal protein L28 | 8973    | 12.1    | 3        |
|              | PROKKA_92879                                         | Major outer membrane protein<br>P.IB precursor                           | 39796   | 4.8     | 14       |
| PROKKA_30155 | Alpha-ketoglutarate-dependent<br>taurine dioxygenase | 12167                                                                    | 5.3     | 1       |          |

204



205 **Table S1 continued:**

| ID           | Database ID          | Description                                    | mW (Da) | pI (pH) | Peptides |
|--------------|----------------------|------------------------------------------------|---------|---------|----------|
| ML-004       | PROKKA_118556        | Superoxide dismutase [Fe]                      | 21960   | 5.3     | 4        |
|              | PROKKA_48537         | Superoxide dismutase [Fe]                      | 21976   | 5.7     | 3        |
|              | PROKKA_48865         | hypothetical protein                           | 8980    | 5.8     | 4        |
|              | PROKKA_112895        | Phage portal protein                           | 37687   | 5.5     | 1        |
|              | PROKKA_78659         | hypothetical protein                           | 152376  | 5.4     | 11       |
|              | PROKKA_52769         | LPS-assembly lipoprotein<br>LptE               | 22131   | 8.5     | 15       |
| ML-005       | PROKKA_119255        | Superoxide dismutase [Fe]                      | 21990   | 5.5     | 14       |
|              | PROKKA_123218        | Superoxide dismutase [Fe]                      | 21988   | 5.5     | 16       |
|              | PROKKA_54206         | Superoxide dismutase [Fe]                      | 22031   | 5.5     | 10       |
|              | PROKKA_136888        | Superoxide dismutase [Fe]                      | 21950   | 5.5     | 10       |
|              | <b>PROKKA_47441</b>  | <b>Putative hydrolase YdeN</b>                 | 24540   | 5.7     | 9        |
|              | PROKKA_120225        | Hypothetical protein                           | 15133   | 6.6     | 4        |
|              | PROKKA_92879         | Major outer membrane protein<br>P.IB precursor | 39796   | 4.8     | 15       |
|              | PROKKA_52696         | Hypothetical protein                           | 13173   | 9.6     | 2        |
|              | PROKKA_102188        | Outer membrane protein A<br>precursor          | 17906   | 4       | 3        |
|              | PROKKA_120445        | Peptidase inhibitor I78 family<br>protein      | 9730    | 4.5     | 1        |
| PROKKA_61135 | Hypothetical protein | 9338                                           | 9.6     | 2       |          |

206

207 **Table S1 continued:**

| ID     | Database ID         | Description                                                  | mW (Da) | pI (pH) | Peptides |
|--------|---------------------|--------------------------------------------------------------|---------|---------|----------|
| ML-006 | PROKKA_00170        | Outer membrane protein W precursor                           | 24683   | 5.8     | 10       |
|        | PROKKA_92879        | Major outer membrane protein P.IB precursor                  | 39796   | 4.8     | 25       |
|        | PROKKA_126912       | Outer membrane efflux protein                                | 10568   | 9.8     | 3        |
|        | PROKKA_67835        | Superoxide dismutase [Fe]                                    | 22892   | 5.5     | 6        |
| ML-007 | <b>PROKKA_02512</b> | <b>Putative acyl-CoA thioester hydrolase</b>                 | 15058   | 7.3     | 5        |
|        | PROKKA_56214        | Peptidyl-prolyl cis-trans isomerase cyp18                    | 21701   | 6.3     | 7        |
| ML-008 | PROKKA_92879        | Major outer membrane protein P.IB precursor                  | 39796   | 4.8     | 16       |
|        | PROKKA_12580        | Peptidoglycan-associated lipoprotein precursor               | 18472   | 6.5     | 9        |
|        | <b>PROKKA_02512</b> | <b>putative acyl-CoA thioester hydrolase</b>                 | 15058   | 7.3     | 4        |
|        | PROKKA_62359        | bifunctional enoyl-CoA hydratase/phosphate acetyltransferase | 15132   | 7.2     | 2        |
|        | PROKKA_134130       | hypothetical protein                                         | 8378    | 8.3     | 2        |
|        | PROKKA_90774        | Methionine synthase                                          | 23142   | 4.8     | 2        |

208

209

210 **Table S1 continued:**

| ID     | Database ID          | Description                                    | mW (Da) | pI (pH) | Peptides |
|--------|----------------------|------------------------------------------------|---------|---------|----------|
| ML-009 | PROKKA_112699        | Outer membrane protein W precursor             | 24708   | 5.9     | 6        |
|        | PROKKA_70441         | hypothetical protein                           | 13678   | 6.6     | 4        |
|        | PROKKA_77573         | hypothetical protein                           | 21589   | 10.5    | 3        |
|        | PROKKA_21264         | Maf-like protein YceF                          | 9493    | 4.7     | 2        |
|        | <b>PROKKA_130292</b> | <b>Esterase TesA precursor</b>                 | 21383   | 5.6     | 5        |
|        | PROKKA_138839        | ADP-ribose pyrophosphatase                     | 23131   | 4.9     | 2        |
|        | PROKKA_90774         | Methionine synthase                            | 23142   | 4.8     | 4        |
| ML-010 | PROKKA_05026         | hypothetical protein                           | 8805    | 8.8     | 5        |
|        | <b>PROKKA_80567</b>  | <b>Thioesterase superfamily protein</b>        | 12138   | 5.2     | 4        |
|        | <b>PROKKA_40999</b>  | <b>Esterase TesA precursor</b>                 | 21348   | 5.2     | 7        |
|        | PROKKA_90774         | Methionine synthase                            | 23142   | 4.8     | 2        |
|        | PROKKA_143609        | Methyl-accepting chemotaxis protein McpS       | 58423   | 4.7     | 7        |
|        | PROKKA_138839        | ADP-ribose pyrophosphatase                     | 23131   | 4.9     | 2        |
|        | PROKKA_13373         | Hypothetical protein                           | 20831   | 9.7     | 7        |
| ML-011 | none                 |                                                |         |         |          |
| ML-012 | PROKKA_139397        | Hypothetical protein                           | 6677    | 5.5     | 1        |
|        | PROKKA_51656         | Ribosomal protein S6 modification protein      | 6035    | 7.9     | 3        |
|        | PROKKA_96934         | Peptidoglycan-associated lipoprotein precursor | 19946   | 7.4     | 8        |
|        | PROKKA_137937        | Hypothetical protein                           | 23547   | 5.6     | 6        |

211

212 **Table S1 continued:**

| ID     | Database ID         | Description                                                                                                                                     | mW (Da) | pI (pH) | Peptides |
|--------|---------------------|-------------------------------------------------------------------------------------------------------------------------------------------------|---------|---------|----------|
| ML-013 | PROKKA_145948       | Alkyl hydroperoxide reductase subunit C                                                                                                         | 13265   | 5.3     | 2        |
|        | PROKKA_13373        | hypothetical protein                                                                                                                            | 20831   | 9.7     | 6        |
|        | PROKKA_121960       | Outer membrane protein P6 precursor                                                                                                             | 17810   | 5       | 7        |
|        | PROKKA_31930        | Alkyl hydroperoxide reductase subunit C                                                                                                         | 20759   | 4.8     | 4        |
|        | PROKKA_05026        | Hypothetical protein                                                                                                                            | 8805    | 8.8     | 1        |
| ML-014 | PROKKA_121960       | Outer membrane protein P6 precursor                                                                                                             | 17810   | 5       | 6        |
|        | PROKKA_39260        | Outer membrane protein P6 precursor^APROKKA_138904<br>Outer membrane protein P6 precursor^APROKKA_152373<br>Outer membrane protein P6 precursor | 17707   | 5       | 6        |
|        | PROKKA_13373        | Hypothetical protein                                                                                                                            | 20831   | 9.7     | 5        |
|        | PROKKA_52867        | Hypothetical protein^APROKKA_80758<br>hypothetical protein                                                                                      | 20674   | 9.7     | 4        |
|        | <b>PROKKA_12101</b> | <b>Putative acyl-CoA thioester hydrolase</b>                                                                                                    | 15226   | 6.4     | 3        |

213
